# Supplementary material for: Tackling the Complexity of the Exposome: Considerations from the Gunma University Initiative for Advanced Research (GIAR) Exposome Symposium
Source: PubMed Central journal article supplement (PMC6631702; doi:10.3390/metabo9060106), 2019-06-06
Supplement: metabolites-09-00106-s001.pdf [file metabolites-09-00106-s001.pdf]

# The 5<sup>th</sup> International Symposium of Gunma University Initiative for Advanced Research (GIAR)

**Date** Tuesday, October 23<sup>rd</sup>, 2018  
13:00 ~ 19:00 (OPEN 12:45)

**Venue** Tojo Hall  
@ Gunma University Showa Campus

## WELCOME ADDRESS

13:00 ~ 13:05 **Hiroshi Hiratsuka (President of Gunma University)**

## [SESSION 1] Frontiers in Metabolome and Proteome Research

13:05 ~ 13:10 Session overview (**Hideru Obinata, GIAR**)

13:10 ~ 13:40 “<sup>13</sup>C-Metabolic flux analysis of drug-induced rewiring of cancer cell metabolism”  
**Fumio Matsuda (Graduate School of Information Science and Technology, Osaka University)**

13:40 ~ 14:10 “Development and application of mass spectrometry-based lipidomics strategy in basic and clinical research”

**Yoshihiro Kita (Graduate School of Medicine, The University of Tokyo)**

14:10 ~ 14:40 “Capillary electrophoresis-mass spectrometry (CE-MS)-based metabolomics and its clinical application”

**Akiyoshi Hirayama (Institute for Advanced Biosciences, Keio University)**

14:40 ~ 15:10 “Recent progresses of quantitative proteomics in clinical research”

**Sumio Ohtsuki (Faculty of Life Sciences, Kumamoto University)**

15:10 ~ 15:30 COFFEE BREAK

## [SESSION 2] The Exposome: Crossroads in Metabolism, Disease and the Environment

15:30 ~ 15:35 Session overview (**Craig Wheelock, Karolinska Institutet/GIAR**)

15:35 ~ 16:05 “An update on epigenetics, environmental exposure and respiratory disease”  
**Erik Melén (Institute of Environmental Medicine, Karolinska Institutet)**

16:05 ~ 16:35 “Neighborhood environmental determinants of asthma morbidity”  
**Matthew Perzanowski (Mailman School of Public Health Columbia University)**

16:35 ~ 17:05 “Mapping human chemical diversity and the non-genetic landscape of disease”  
**Mohit Jain (School of Medicine, University of California San Diego)**

17:05 ~ 17:35 “Early life environment and neurodevelopmental trajectories”  
**Manish Arora (Department of Environmental Medicine and Public Health, Icahn School of Medicine at Mount Sinai)**

17:35 ~ 17:50 SHORT BREAK

## INTRODUCTION OF A NEW INTERNATIONAL OPEN LABORATORY AT GIAR

17:50 ~ 18:05 “Design and preparation of innovative functionalizable silsesquioxanes as building blocks for new nano-sized supported catalysts”

**Yujia Liu (International Open Laboratory-ENSCM Lab, GIAR)**

## SPECIAL LECTURE

18:05 ~ 18:55 “Translation of lipidomic technologies towards quantification of blood lipids and their natural variations”

**Markus Wenk (Yong Loo Lin School of Medicine, National University of Singapore)**

## CLOSING REMARK

18:55 ~ 19:00 **Takashi Minegishi (GIAR chairperson / Vice President of Gunma University)**

Registration required to attend the reception from 19:30 at Cinema restaurant  
Please send an email to [kk-kensui4@jimu.gunma-u.ac.jp](mailto:kk-kensui4@jimu.gunma-u.ac.jp) by Oct. 16<sup>th</sup>
